# Supplementary material for: Cell geometry and the cytoskeleton impact the nucleo-cytoplasmic localisation of the SMYD3 methyltransferase
Source: PubMed Central journal article supplement (PMC7691988; doi:10.1038/s41598-020-75833-9), 2020-11-26
Supplement: 41598_2020_75833_MOESM1_ESM.pdf [file 41598_2020_75833_MOESM1_ESM.pdf]

## Supplementary Information

### **Cell geometry and the cytoskeleton impact the nucleo-cytoplasmic localisation of the SMYD3 methyltransferase**

David Pereira<sup>1, 2</sup>, Alain Richert<sup>1</sup>, Souhila Medjkane<sup>2</sup>, Sylvie Hénon<sup>1\*</sup>, Jonathan B Weitzman<sup>2\*</sup>

[1] Université de Paris, CNRS, Matière et Systèmes Complexes (MSC), UMR 7057, F-75006 Paris, France

[2] Université de Paris, CNRS, Epigenetics and Cell Fate (EDC), UMR 7216, F-75006 Paris, France

[\*] Corresponding authors: [jonathan.weitzman@u-paris.fr](mailto:jonathan.weitzman@u-paris.fr), [sylvie.henon@u-paris.fr](mailto:sylvie.henon@u-paris.fr)

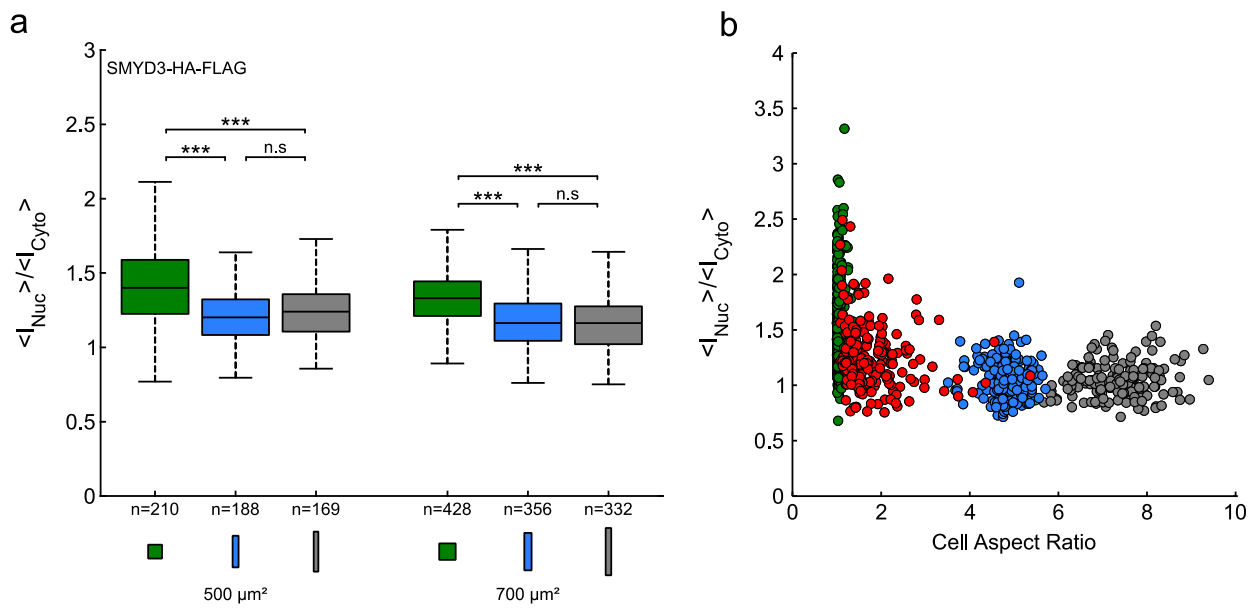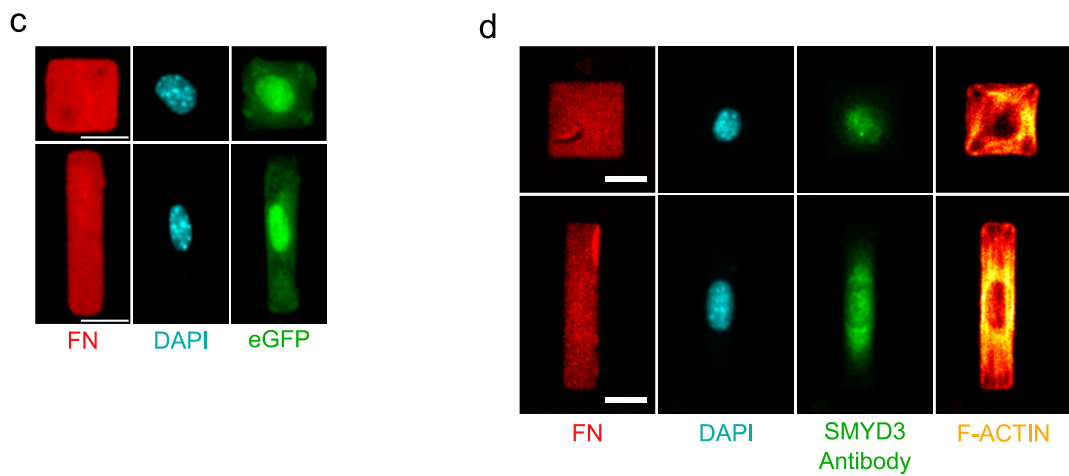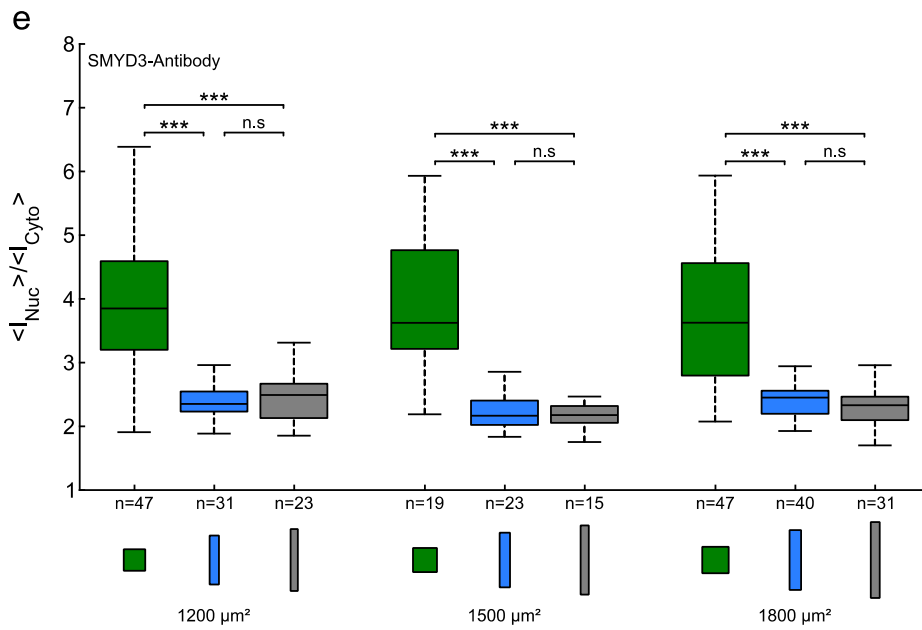

**Figure S1: Cell geometry on fibronectin micropatterns regulates exogenous and endogenous SMYD3 distribution.**

- a)** Quantification of the nuclear:cytoplasmic ( $\langle I_{Nuc} \rangle / \langle I_{Cyto} \rangle$ ) distribution ratio for exogenous SMYD3-HA-Flag on small pattern areas (500 and 700  $\mu\text{m}^2$ ) and geometries: squares (1:1 aspect ratio, green), rectangles (1:5 aspect ratio, blue) and elongated rectangles (1:8 aspect ratio, grey). The median value of the ratio is about 15% higher on squares than on rectangle patterns. A Kruskal-Wallis test was performed for conditions with identical areas.
  - b)** Representation of the nuclear:cytoplasmic ratio of SMYD3-HA-Flag as a function of cell aspect ratio for cells spread on non-patterned substrates (red, n=202), squares (1:1 aspect ratio, green, n=395), rectangles (1:5 aspect ratio, blue, n=252) and elongated rectangles (1:8 aspect ratio, grey, n=163).
  - c)** Micrographs show the fibronectin (FN) patterning, the nuclear DNA staining (DAPI), and localization of control eGFP in C2C12 cells plated on square or rectangle patterns (1200  $\mu\text{m}^2$ ). See Figure 1e for quantification data.
  - d)** Non-transfected C2C12 cells were plated on different fibronectin micropatterns with the same area (1200  $\mu\text{m}^2$ ), but different aspect ratios; square (1:1, upper panels) or rectangle (1:5, lower panels). The micrographs show the fibronectin (FN) patterning, the nuclear DNA staining (DAPI), endogenous SMYD3 protein detected with a specific antibody (SMYD3) and F-actin.
  - e)** Quantification of the nuclear:cytoplasmic ( $\langle I_{Nuc} \rangle / \langle I_{Cyto} \rangle$ ) distribution ratio for endogenous SMYD3 protein over a range of pattern areas (1200-1800  $\mu\text{m}^2$ ) and geometries: squares (1:1 aspect ratio, green), rectangles (1:5 aspect ratio, blue) and elongated rectangles (1:8 aspect ratio, grey). The median value of the ratio is 48 to 67% higher on squares than on rectangle patterns. A Kruskal-Wallis test was performed for conditions with identical areas.
  - f)** Western blot analysis of exogenous SMYD3-HA-FLAG levels compared to endogenous SMYD3 in control C2C12 cells.
- n = number of individual cells measured. \*\*\*  $p < 0.001$ , n.s. = not statistically significant.

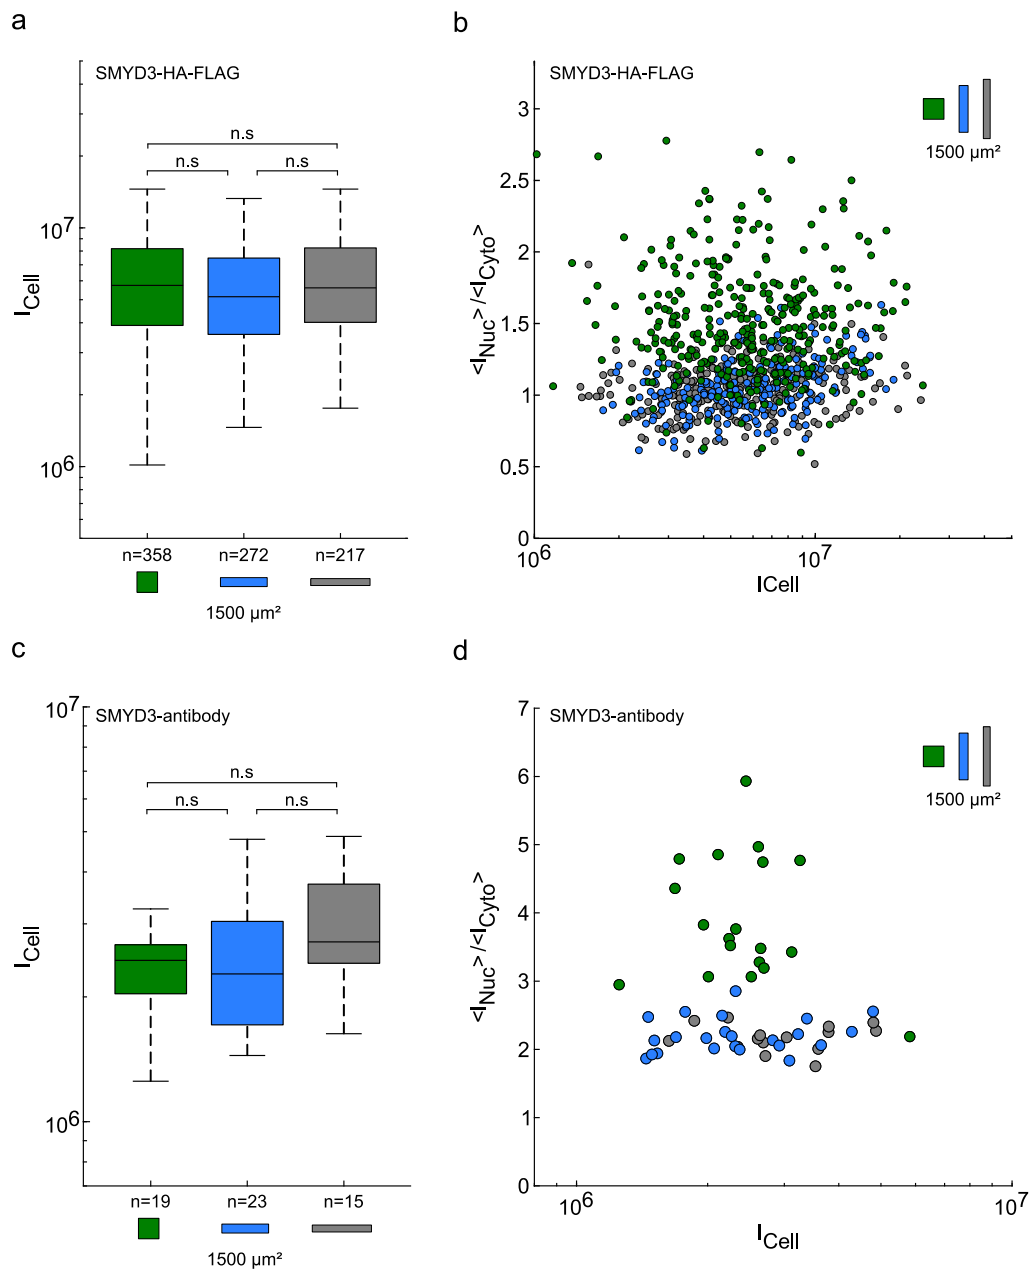

**Figure S2: Cell geometry does not affect the total intensity of SMYD3**

- a)** Quantification of the total cell intensity of exogenous SMYD3-HA-Flag on pattern area ( $1500 \mu\text{m}^2$ ) of different geometries: squares (1:1 aspect ratio, green), rectangles (1:5 aspect ratio, blue) and elongated rectangles (1:8 aspect ratio, grey).  $n$  = number of individual cells measured. An ANOVA test was performed for conditions with identical areas ( $1500\mu\text{m}^2$ ). n.s.; = not statistically significant
- b)** Quantification of the nuclear:cytoplasmic ( $\langle I_{\text{Nuc}} \rangle / \langle I_{\text{Cyto}} \rangle$ ) distribution ratio for exogenous SMYD3-HA-Flag on pattern area ( $1500 \mu\text{m}^2$ ) compare to the total intensity for each cell.
- c)** Quantification of the total cell intensity of endogenous SMYD3 on pattern area ( $1500 \mu\text{m}^2$ ) of different geometries: squares (1:1 aspect ratio, green), rectangles (1:5 aspect ratio, blue) and elongated rectangles (1:8 aspect ratio, grey).  $n$  = number of individual cells measured.
- d)** Quantification of the nuclear:cytoplasmic ( $\langle I_{\text{Nuc}} \rangle / \langle I_{\text{Cyto}} \rangle$ ) distribution ratio for endogenous SMYD3 on pattern area ( $1500 \mu\text{m}^2$ ) compare to the total intensity for each cell.  $n$  = number of individual cells measured. An ANOVA test was performed for conditions with identical areas ( $1500\mu\text{m}^2$ ). n.s.; = not statistically significant

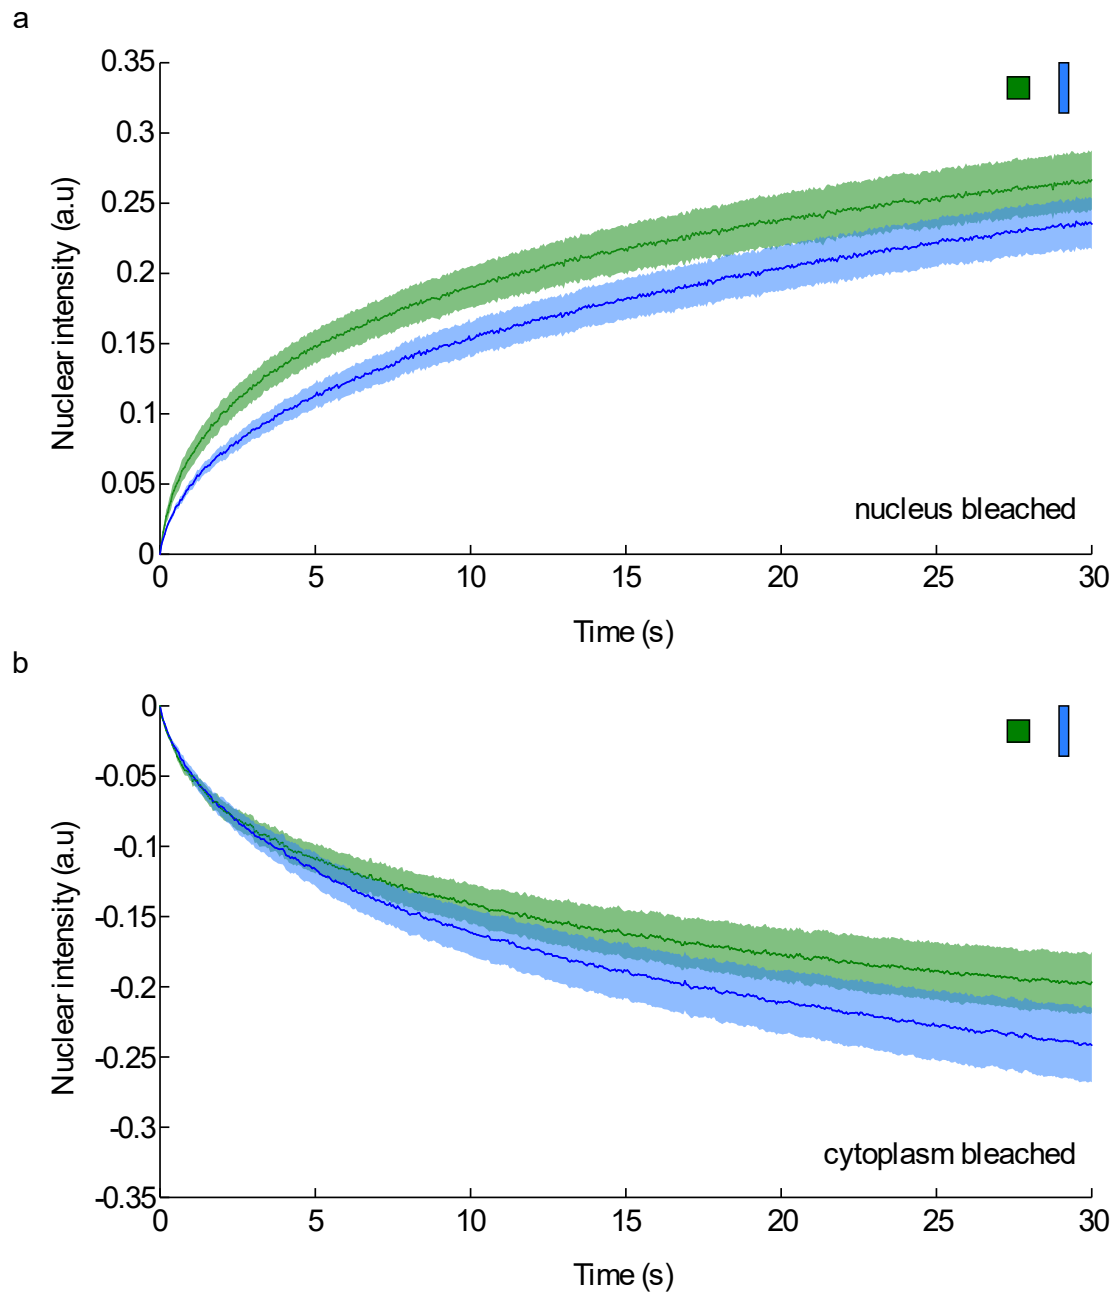

**Figure S3: Cell geometry affects the shuttling of SMYD3-eGFP.**

- a)** Average of recovery curves of the nuclear intensity of SMYD3-eGFP after photobleaching of the nucleus for cells spread on squares (1:1 aspect ratio, green) or rectangles (1:5 aspect ratio, blue).
- b)** Average of decay curves of the nuclear intensity of SMYD3-eGFP after photobleaching of the cytoplasm for cells spread on squares (1:1 aspect ratio, green) or rectangles (1:5 aspect ratio, blue).

The data are presented with +/- S.E.M (standard error mean).

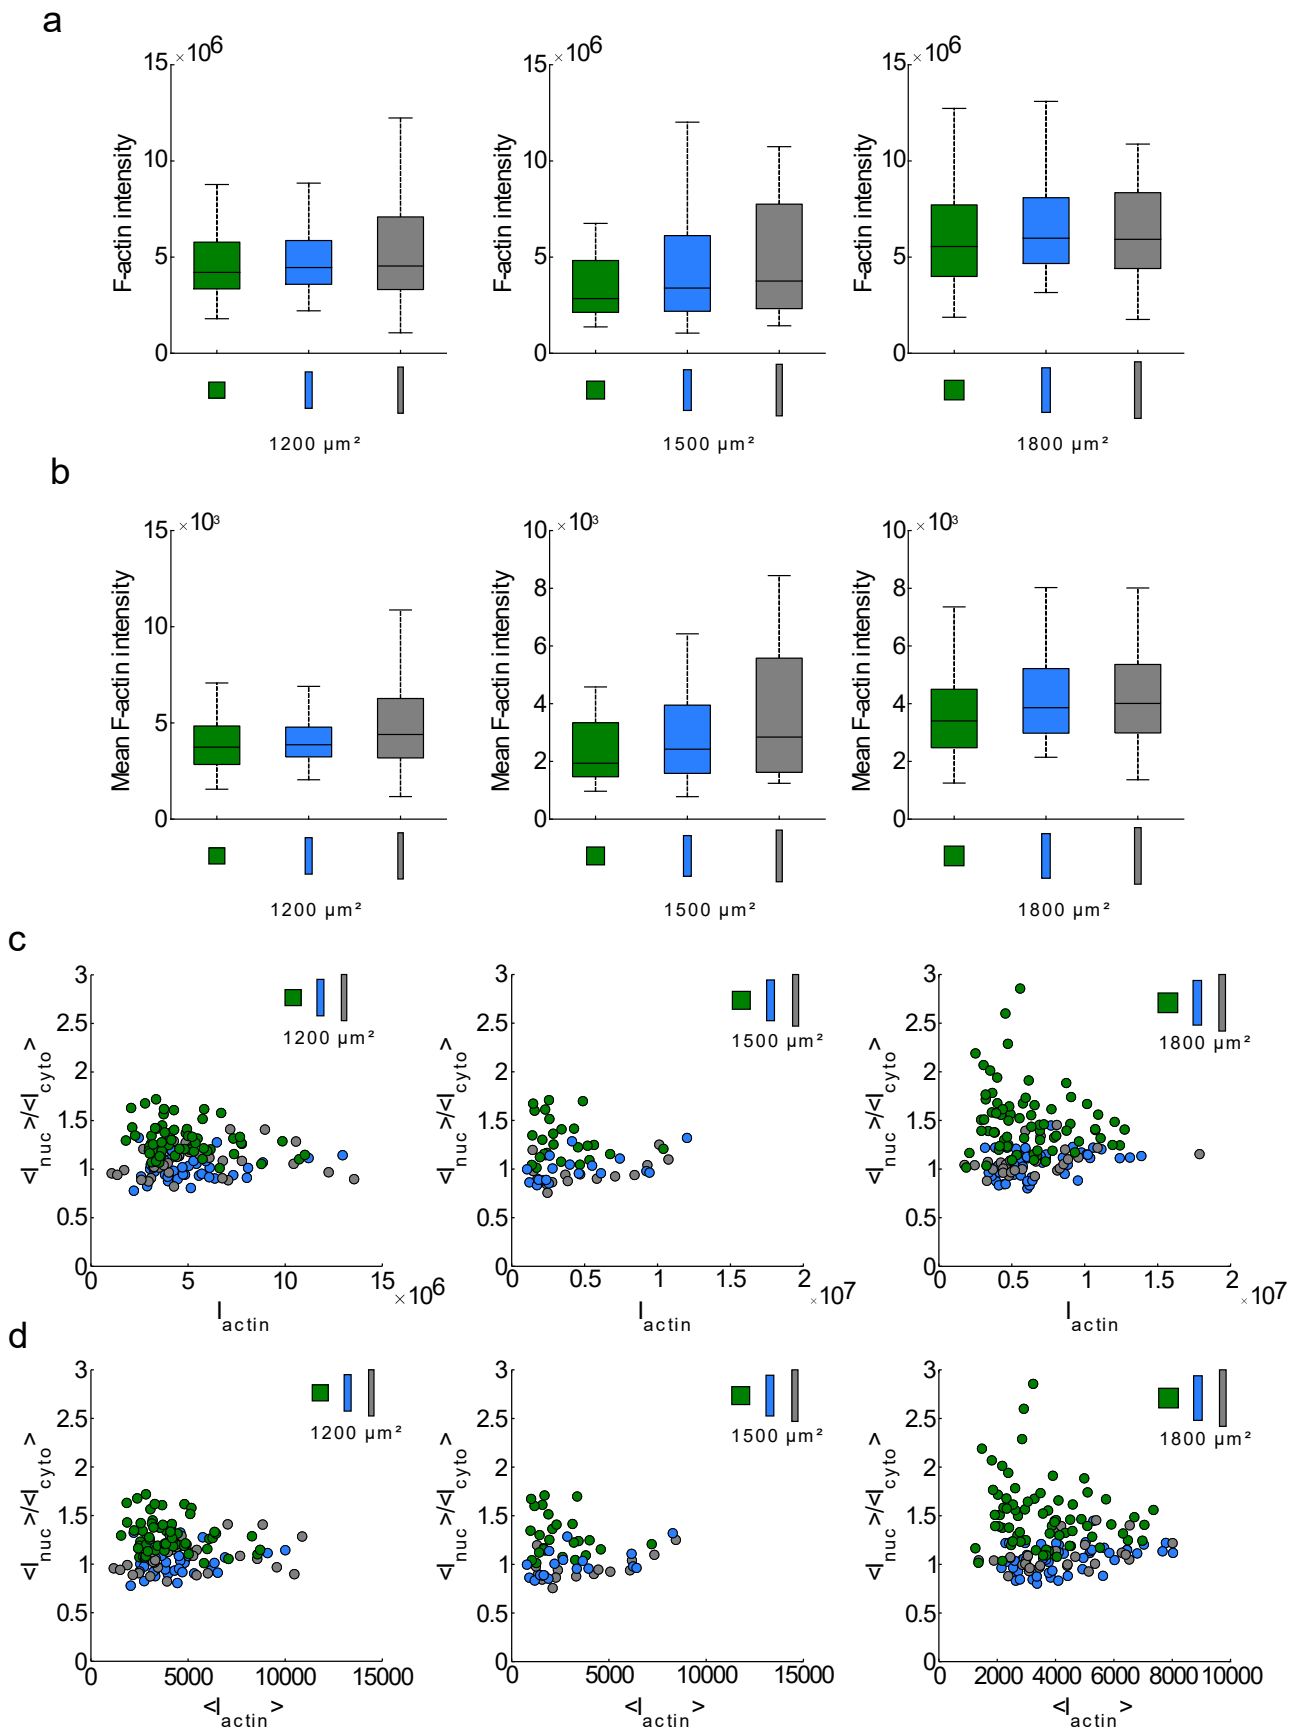

**Figure S4: The amount of F-actin in cells spread on micropatterns is independent of cell shape or the SMYD3 distribution.**

- a) Total amount of F-actin, quantified by the intensity of SiRactin staining for cells plated on micropatterns with different areas (1200 to 1800  $\mu\text{m}^2$ ) and shapes: squares (1:1 aspect ratio, green), rectangles (1:5 aspect ratio, blue) and elongated rectangles (1:8 aspect ratio, grey).
- b) Mean SiRactin intensity per pixel, under the same conditions.
- c) Nuclear:cytoplasmic ( $\langle I_{\text{Nuc}} \rangle / \langle I_{\text{Cyto}} \rangle$ ) distribution ratio for exogenous SMYD3-HA-Flag on pattern area (1500  $\mu\text{m}^2$ ) as a function of SiRactin total intensity for each cell.
- d) Nuclear:cytoplasmic ( $\langle I_{\text{Nuc}} \rangle / \langle I_{\text{Cyto}} \rangle$ ) distribution ratio for exogenous SMYD3-HA-Flag on pattern area (1500  $\mu\text{m}^2$ ) as a function of SiRactin mean intensity per pixel for each cell.

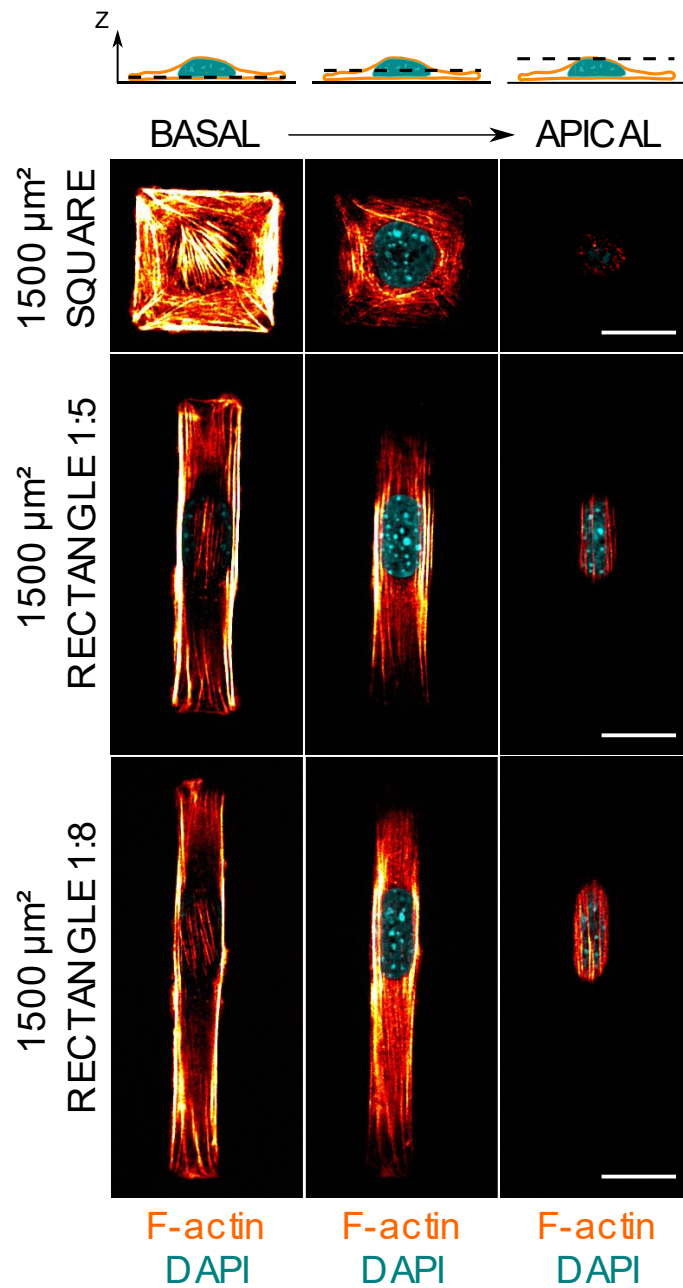

**Figure S5: Cell geometry on fibronectin micropatterns affects the organization of the actin cytoskeleton.**

Micrographs of cells spread on square (1:1 aspect ratio), rectangular (1:5 aspect ratio) and elongated rectangular (1:8 aspect ratio) micropatterns show a different organization of the F-actin networks (orangish). Scale bars:  $20 \mu\text{m}$ .



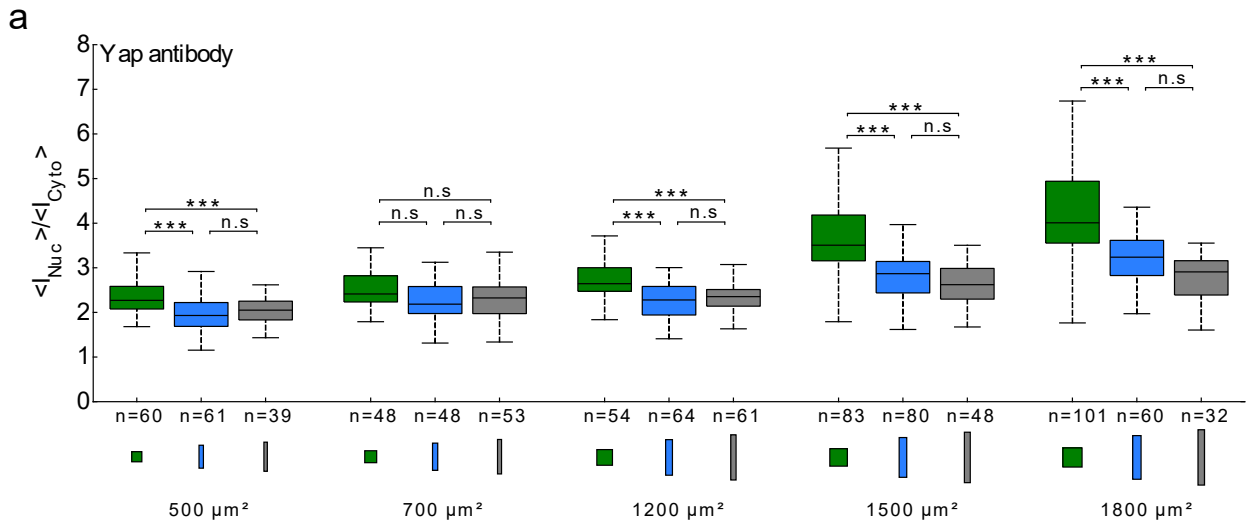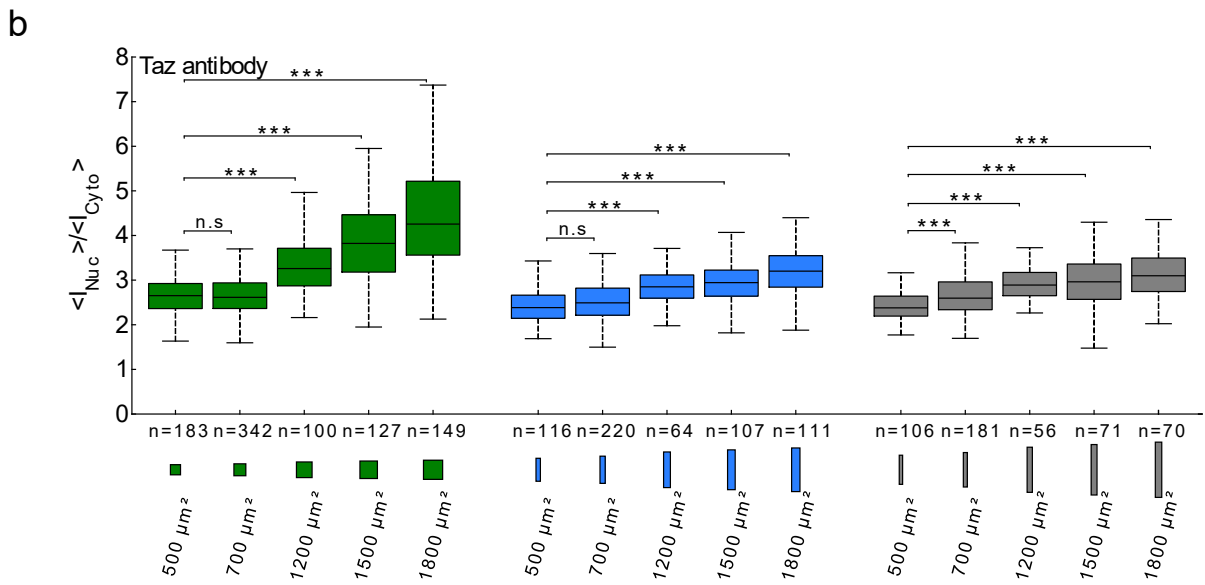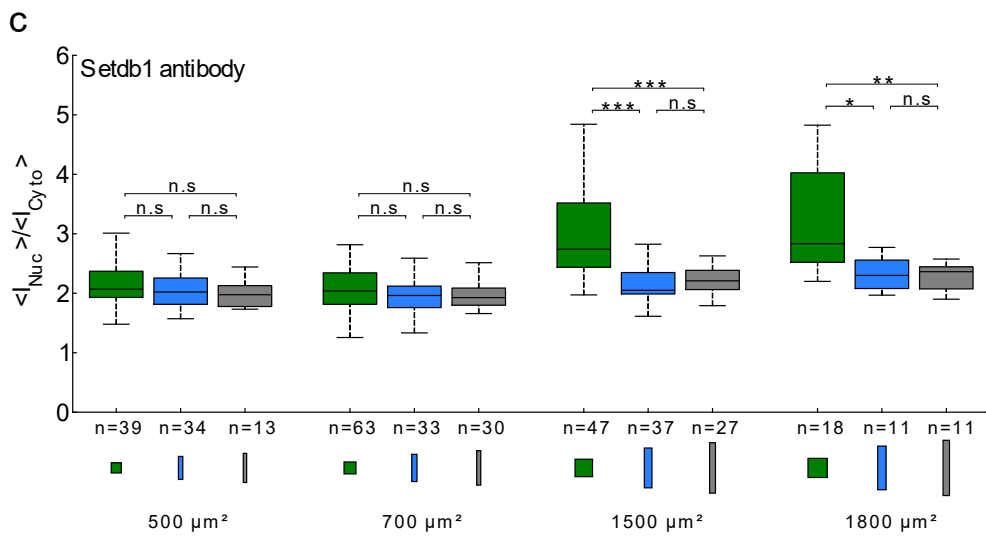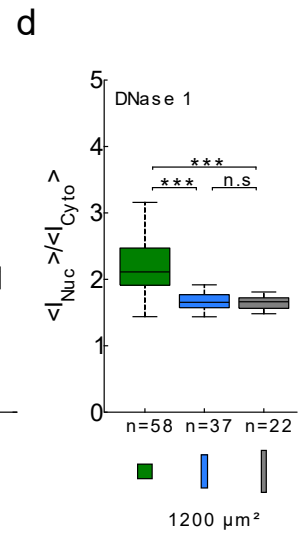

**Figure S6: Cell geometry on fibronectin micropatterns regulates the localization of a range of regulatory factors.**

- a)** Quantification of the nuclear:cytoplasmic ( $\langle I_{Nuc} \rangle / \langle I_{Cyto} \rangle$ ) distribution ratio for YAP/TAZ (anti-YAP antibody) in cells plated on different pattern areas (500-1800  $\mu\text{m}^2$ ) or shapes: squares (1:1 aspect ratio, red), rectangles (1:5 aspect ratio, blue) and elongated rectangles (1:8 aspect ratio, grey). The median value of the ratio is 10 to 24% higher on squares than on rectangles. An ANOVA test was performed for conditions with identical areas (500 $\mu\text{m}^2$ , 700 $\mu\text{m}^2$ , 1200 $\mu\text{m}^2$ ). A Kruskal-Wallis test was performed for conditions with identical areas (1500 $\mu\text{m}^2$ , 1800 $\mu\text{m}^2$ ).
- b)** Quantification of the nuclear:cytoplasmic ( $\langle I_{Nuc} \rangle / \langle I_{Cyto} \rangle$ ) distribution ratio for YAP/TAZ (anti-TAZ antibody) in cells plated on different pattern areas (500-1800  $\mu\text{m}^2$ ) and shapes: squares (1:1 aspect ratio, red), rectangles (1:5 aspect ratio, blue) and elongated rectangles (1:8 aspect ratio, grey). A Kruskal-Wallis test was performed for conditions with identical aspect ratios.
- c)** Quantification of the nuclear:cytoplasmic ( $\langle I_{Nuc} \rangle / \langle I_{Cyto} \rangle$ ) distribution ratio for Setdb1 protein in cells plated on different pattern areas (500-1800  $\mu\text{m}^2$ ) and geometries: squares (1:1 aspect ratio, red), rectangles (1:5 aspect ratio, blue) and elongated rectangles (1:8 aspect ratio, grey). For areas 1500 and 1800  $\mu\text{m}^2$ , the median value of the ratio is 20-33% higher on squares than on rectangles. An ANOVA test was performed for cell spread on 500  $\mu\text{m}^2$  micropatterns. A Kruskal-Wallis test was performed for conditions with identical areas (700  $\mu\text{m}^2$ , 1500  $\mu\text{m}^2$ , 1800  $\mu\text{m}^2$ ).
- d)** Quantification of the nuclear:cytoplasmic ( $\langle I_{Nuc} \rangle / \langle I_{Cyto} \rangle$ ) distribution ratio for DNase1 for a single pattern area 1200  $\mu\text{m}^2$  and geometries: squares (1:1 aspect ratio, green), rectangles (1:5 aspect ratio, blue) and elongated rectangles (1:8 aspect ratio, grey). The median value of the ratio is about 30% higher on squares than on rectangle patterns. A Kruskal-Wallis test was performed between conditions.

n = number of individual cells measured. \*  $p < 0.05$ , \*\*  $p < 0.01$ , \*\*\*  $p < 0.001$ , n.s; = not statistically significant.

| Figure  |                                      | number of independent repeats |
|---------|--------------------------------------|-------------------------------|
| 1.b     |                                      | 5                             |
| 1.d     |                                      | $\geq 6$                      |
| 1.e     |                                      | 2                             |
| 2.a-d   |                                      | 3                             |
| 2.e     |                                      | 1                             |
| 3.b,c,e | controls                             | $\geq 5$                      |
| 3.b,c,e | LMB                                  | 2                             |
| 3.h     |                                      | 3                             |
| 3.i     |                                      | 1                             |
| 4.b     | control                              | 5                             |
| 4.b     | Latrunculin A, B                     | 2                             |
| 4.c     | control                              | 9                             |
| 4.c     | drugs                                | $\geq 2$                      |
| 5.b     | 700 $\mu\text{m}^2$                  | 2                             |
| 5.b,d   | 1500, 1800 $\mu\text{m}^2$           | 2                             |
| S1.a    |                                      | $\geq 4$                      |
| S1.b    |                                      | $\geq 5$                      |
| S1.e    | 1200 $\mu\text{m}^2$                 | 2                             |
| S1.e    | 1500, 1800 $\mu\text{m}^2$           | 1                             |
| S6.a,c  |                                      | 1                             |
| S6.b    | 500, 700, 1500, 1800 $\mu\text{m}^2$ | 2                             |
| S6.b,d  | 1200 $\mu\text{m}^2$                 | 1                             |

**Table S1:** Numbers of repeats of the different experiments.
